# Supplementary material for: Light perception in aerial tissues enhances DWF4 accumulation in root tips and induces root growth
Source: PubMed Central journal article supplement (PMC5431926; doi:10.1038/s41598-017-01872-4), 2017-05-12
Supplement: 41598_2017_1872_MOESM1_ESM.pdf [file 41598_2017_1872_MOESM1_ESM.pdf]

Supplementary Information for

**Light perception in aerial tissues enhances DWF4 accumulation in root tips and induces root growth**

J. Sakaguchi and Y. Watanabe

Department of Life Sciences, Graduate School of Arts and Sciences, University of Tokyo

**Contents of this file**

Figures S1-S3, Tables S1

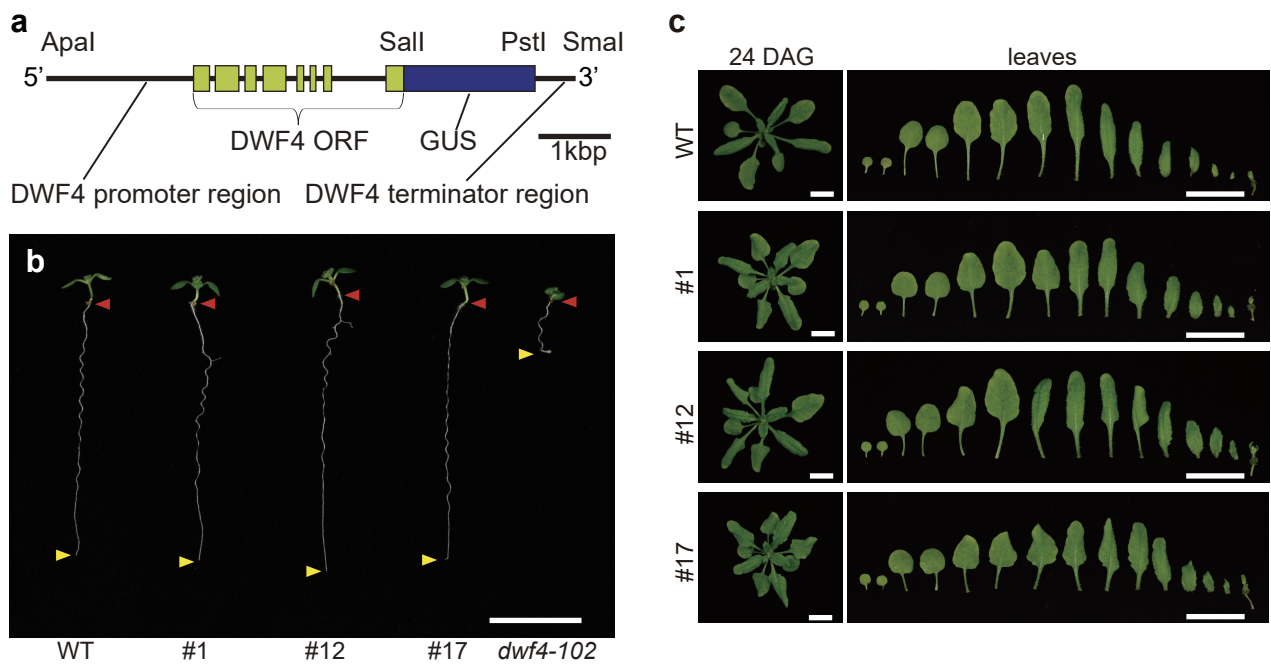

**Figure S1. DWF4-GUS complemented the *dwf4* mutant phenotype.**

(a) proDWF4-DWF4-GUS-termDWF4 construct.

(b) DWF4-GUS plants at the juvenile stage. *dwf4-102* mutant plants were complemented with the construct presented in (a). Red arrowheads indicate the borders between the hypocotyl and the root, while yellow arrowheads indicate the root apex positions.

(c) DWF4-GUS plants at 24 days after germination. The growth of three independent complementation lines was almost the same as that of wild-type plants. Scale bars represent 10 mm.

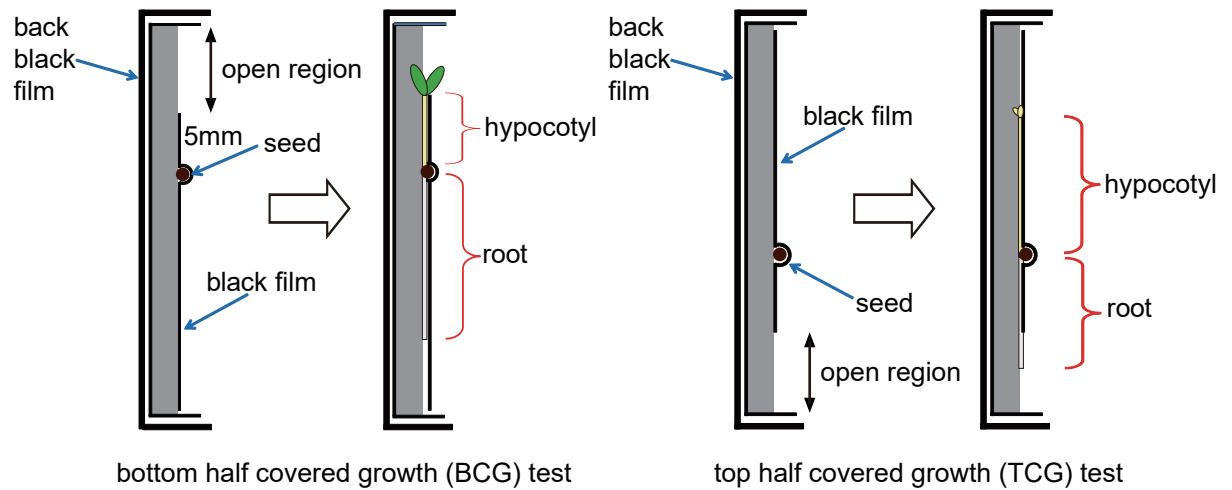

**Figure S2. Models of bottom/top covered growth tests.**

In BCG growth test, plants germinate under simulated dark condition, and after hypocotyl elongation, shoot start to perceive light but root is kept under the dark. In TCG test, plants germinate under simulated dark condition, and after root elongation, root start to perceive light but shoot is kept under the dark.

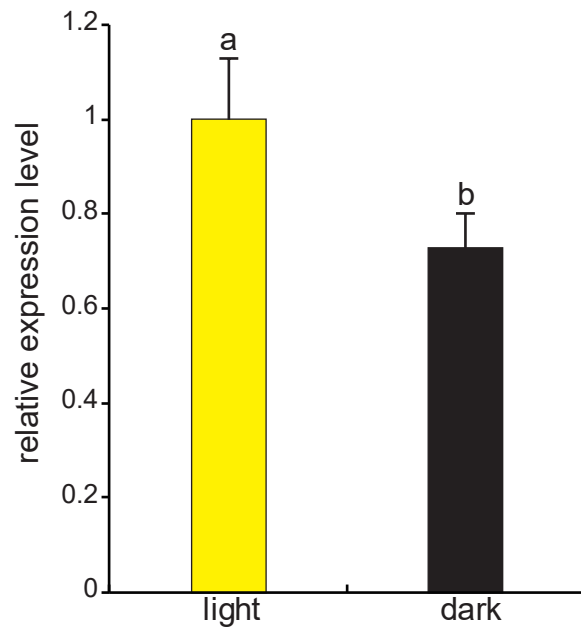

**Figure S3. Relative expression levels of *DWF4* mRNA in root tips.**

From 7 DAG plants, approx. 3 mm length of root tips were collected and qRT-PCR analysis was carried out.

Total RNAs were extracted by NucleoSpin® RNA (MACHEREY-NAGEL, <http://www.mn-net.com/>).

The first strand cDNA was synthesized by PrimeScript™ RT reagent Kit with gDNA Eraser (Perfect Real Time) (TAKARA-BIO, <http://www.takara-bio.co.jp/>). One µg of total RNA was added in a 20 µL reaction system and diluted to 10 ng/µL for the following experiments. The KAPA SYBR® FAST qPCR Kit (KAPABIOSYSTEMS, <https://www.kapabiosystems.com/>) was used for qRT-PCR analyses. All tests were performed in duplicate with a StepOne™ Real-Time PCR Systems (Applied Biosystems, [www.thermofisher.com/](http://www.thermofisher.com/)).

Every PCR was carried out in a 20 µL total volume containing 2 µL first strand cDNA (20 ng total RNA) as template. The relative expression level of each gene was averaged from three replicates using the software installed within equipment using a Quantitation Comparative  $\Delta\Delta C_t$  method.



Table S1. oligonucleotides used in this study

| Oligonucleotide          | Sequence                                |
|--------------------------|-----------------------------------------|
| ApaI-proDWF4+DWF4ORF-fwd | AATGGGCCCTAAACAAATATGTTAATCAATTAGTGGTC  |
| SalI-proDWF4+DWF4ORF-rev | GACGTCGACCAGAATACGAGAAACCCTAATAGGCAAACC |
| PstI-DWF4Term.-fwd       | AAACTGCAGAAAAAAAAAAGATGAAAGTATTTTTATTC  |
| SmaI-DWF4Term.-rev       | TCCCGGGTGAGAGCTATTGTTATTCATTTAGTCCTTTTG |
| SalI-GUS-fwd             | TTAGTCGACATGTTACGTCCTGTAGAAACCCCAACC    |
| PstI-GUS-rev             | ACTCTGCAGTCATTGTTTGCCTCCCTGCTGC         |
| SALK_020761-RP           | CCGGACATGAGACTTCTTCTG                   |
| SALK_020761-LP           | GGCAGCTCCTACGTCATTAAG                   |
| LBa1                     | TGGTTCACGTAGTGGGCCATCG                  |
| qRT-PCR_RPL7D-fwd        | CCGGGCTAAACAGTACTCCA                    |
| qRT-PCR_RPL7D-rev        | TTCAGCTGGATTAATTCCTTT                   |
| qRT-PCR_DWF4_5'-fwd      | CAACATGTCTCCAAGTATGG                    |
| qRT-PCR_DWF4_5'-rev      | GACGTGCGTGACTTAAGAAG                    |
